# Supplementary material
Source: PubMed Central journal article supplement (PMC2964996)
Supplement: JCI44011sd.pdf [file JCI44011sd.pdf]

## Supplemental data

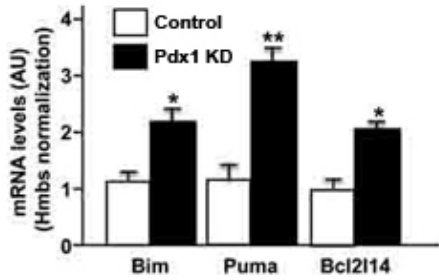

**Figure S1**

Pdx1 deficiency increases Bim, Puma and Bcl2l14 mRNA expressions in MIN6 cells. Real-time PCR of Bim, Puma and Bcl2l14 mRNAs in Pdx1 knock down (KD) MIN6 cells. \*\* $p < 0.01$ ; \* $p < 0.05$ . Mean  $\pm$  SEM;  $n = 4-6$  per group.

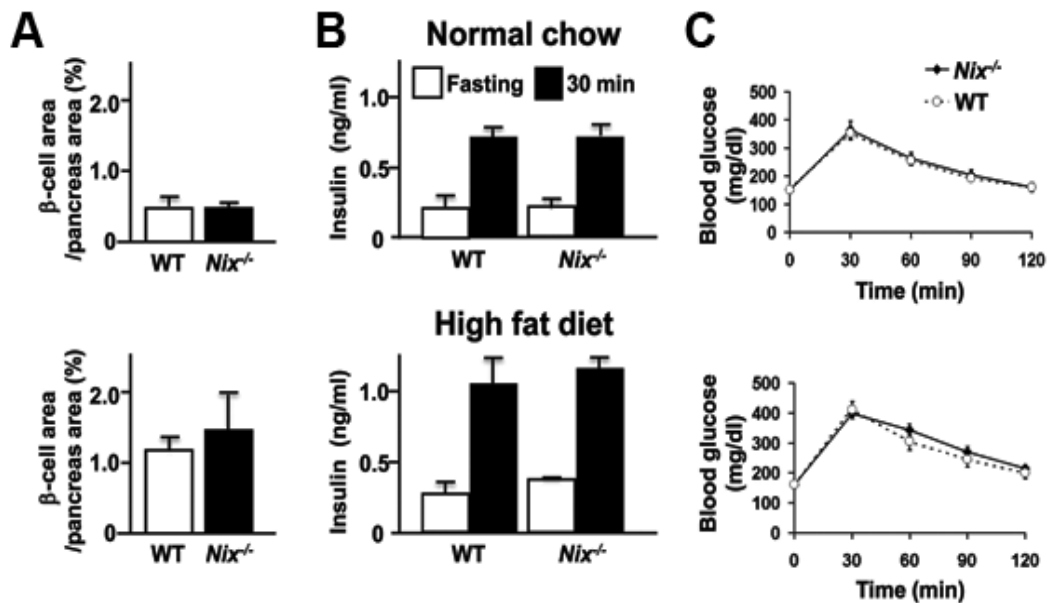

**Figure S2**

$\beta$ -cell mass, insulin secretion and glucose tolerance test in normal chow and high fat diets treated  $Nix^{-/-}$  mice. (A) Quantitation of  $\beta$ -cell per pancreas area on normal chow (upper panel) and high fat diets (lower panel) treated  $Nix^{-/-}$  and wild-type (WT) mice ( $n = 5$ , each). (B) Insulin levels measured fasting and 30 min after intraperitoneal dextrose in normal chow (upper panel) and high fat diets (lower panel) treated  $Nix^{-/-}$  or WT mice ( $n = 8-19$ , each). (C) Glucose levels following intraperitoneal injection of dextrose (1 g/kg) on normal chow (upper panel) and high fat diets (lower panel) treated mice.  $Nix^{-/-}$ , triangle; WT, circles ( $n = 8-19$ , each). All group data are mean  $\pm$  SEM of 8-10 weeks of age.

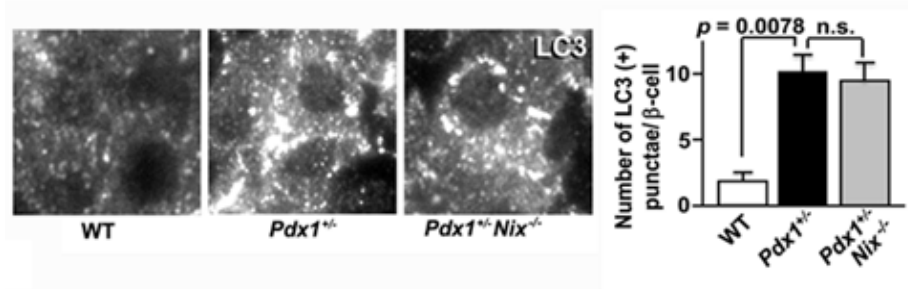

### Figure S3

No change in autophagy in islets from *Pdx1*<sup>+/-</sup>*Nix*<sup>-/-</sup> mice. LC3 staining in wild-type (WT), *Pdx1*<sup>+/-</sup>, and *Pdx1*<sup>+/-</sup>*Nix*<sup>-/-</sup> mice. Quantitation of group data for LC3-positive punctae per β-cell are shown on the right ( $n = 4-6$ , each group). Original magnification, x400. Data represent mean ± SEM.

## Supplemental Table S1

| Gene symbol        | Gene name                                                   | Accession    | p-value | Fold-change | Gene ontology                                    |
|--------------------|-------------------------------------------------------------|--------------|---------|-------------|--------------------------------------------------|
| <b>Upregulated</b> |                                                             |              |         |             |                                                  |
| Ddit3              | DNA-damage inducible transcript 3                           | NM_007837    | 0.00068 | 1.90        | Apoptosis                                        |
| Ambp               | alpha 1 microglobulin/bikunin                               | NM_007443    | 0.0094  | 1.89        | Transport                                        |
| Tcl1               | T-cell lymphoma breakpoint 1                                | NM_009337    | 0.0044  | 1.86        | Nucleus                                          |
| Upp1               | uridine phosphorylase 1                                     | NM_001159401 | 0.0013  | 1.86        | Glucose metabolic process                        |
| Sufu               | suppressor of fused homolog                                 | NM_001025391 | 0.0061  | 1.75        | Nucleus                                          |
| Ppap2b             | phosphatidic acid phosphatase type 2B                       | NM_080555    | 0.0072  | 1.75        | Lipid metabolic process                          |
| Puma               | p53-upregulated modulator of apoptosis                      | NM_133234    | 0.0023  | 1.75        | Apoptosis                                        |
| Ephx1              | epoxide hydrolase 1, microsomal                             | NM_010145    | 0.0032  | 1.73        | Response to stress                               |
| Nix                | BCL2/adenovirus E1B interacting protein 3-like              | NM_009761    | 0.0027  | 1.73        | Apoptosis                                        |
| Aldh2              | aldehyde dehydrogenase 2, mitochondrial                     | NM_009656    | 0.0055  | 1.73        | Mitochondrion                                    |
| Il7                | interleukin 7                                               | NM_008371    | 0.0092  | 1.71        | Apoptosis                                        |
| Paox               | polyamine oxidase                                           | NM_153783    | 0.0084  | 1.70        | Apoptosis                                        |
| Mmel1              | membrane metallo-endopeptidase-like 1                       | NM_013783    | 0.0082  | 1.68        | Proteolysis                                      |
| Nras               | neuroblastoma ras oncogene                                  | NM_010937    | 0.0083  | 1.68        | Intracellular signaling cascade                  |
| Fkbp11             | FK506 binding protein 11                                    | NM_024169    | 0.002   | 1.68        | Apoptosis                                        |
| Mmab               | methylmalonic aciduria type B homolog                       | NM_029956    | 0.0072  | 1.67        | Mitochondrion                                    |
| Apof               | apolipoprotein F                                            | NM_133997    | 0.0059  | 1.65        | Transport                                        |
| Syt7               | synaptotagmin VII                                           | NM_018801    | 0.0092  | 1.56        | Transport                                        |
| Bim                | BCL2-interacting protein                                    | NM_009754    | 0.0011  | 1.54        | Apoptosis                                        |
| Kiss1r             | KISS1 receptor                                              | NM_053244    | 0.0073  | 1.52        | Cell surface receptor linked signal transduction |
| Sgk1               | serum/glucocorticoid regulated kinase 1                     | NM_001161845 | 0.0004  | 1.51        | Transport                                        |
| Frzb               | frizzled-related protein                                    | NM_011356    | 0.00025 | 1.48        | Cell surface receptor linked signal transduction |
| Bcl2l14            | BCL2-like 14                                                | NM_025778    | 0.0069  | 1.48        | Apoptosis                                        |
| Dcxr               | dicarbonyl L-xylulose reductase                             | NM_026428    | 0.0021  | 1.46        | Glucose metabolic process                        |
| Gpx2               | glutathione peroxidase 2                                    | NM_030677    | 0.0092  | 1.46        | Response to stress                               |
| Arhgef3            | Rho guanine nucleotide exchange factor (GEF) 3              | NM_027871    | 0.0072  | 1.45        | Intracellular signaling cascade                  |
| Jag2               | jagged 2                                                    | NM_010588    | 0.0091  | 1.43        | Apoptosis                                        |
| Nde1               | nuclear distribution gene E homolog 1                       | NM_001114085 | 0.0098  | 1.43        | Cytoskeleton                                     |
| Mdm2               | transformed mouse 3T3 cell double minute 2                  | NM_010786    | 0.0037  | 1.43        | Nucleus                                          |
| Ctsh               | cathepsin H                                                 | NM_007801    | 0.0038  | 1.42        | Proteolysis                                      |
| Cartpt             | CART prepropeptide                                          | NM_001081493 | 0.0095  | 1.42        | Intracellular signaling cascade                  |
| Fastk              | Fas-activated serine/threonine kinase                       | NM_023229    | 0.0094  | 1.41        | Apoptosis                                        |
| Epn2               | epsin 2                                                     | NM_010148    | 0.0048  | 1.40        | Lipid metabolic process                          |
| Sirt3              | sirtuin 3                                                   | NM_001127351 | 0.0088  | 1.40        | Regulation of transcription                      |
| Olf159             | olfactory receptor 159                                      | NM_019476    | 0.0078  | 1.39        | Cell surface receptor linked signal transduction |
| Aifm2              | apoptosis-inducing factor, mitochondrion-associated 2       | NM_001039194 | 0.0023  | 1.39        | Apoptosis                                        |
| Nme5               | non-metastatic cells 5, protein expressed in                | NM_080637    | 0.0014  | 1.39        | Apoptosis                                        |
| Irf6               | interferon regulatory factor 6                              | NM_016851    | 0.0085  | 1.38        | Regulation of transcription                      |
| Nudt8              | nudix (nucleoside diphosphate linked moiety X)-type motif 8 | NM_025529    | 0.0086  | 1.38        | Mitochondrion                                    |
| Smc1a              | structural maintenance of chromosomes 1A                    | NM_019710    | 0.002   | 1.37        | Response to stress                               |

|                      |                                              |              |        |       |                                                  |
|----------------------|----------------------------------------------|--------------|--------|-------|--------------------------------------------------|
| Bag3                 | BCL2-associated athanogene 3                 | NM_013863    | 0.0031 | 1.37  | Apoptosis                                        |
| Hadh                 | hydroxyacyl-Coenzyme A dehydrogenase         | NM_008212    | 0.0051 | 1.34  | Lipid metabolic process                          |
| Acaa2                | acetyl-Coenzyme A acyltransferase 2          | NM_177470    | 0.0084 | 1.34  | Lipid metabolic process                          |
| Tst                  | thiosulfate sulfurtransferase, mitochondrial | NM_009437    | 0.0026 | 1.34  | Transport                                        |
| Hyal2                | hyaluronoglucosaminidase 2                   | NM_010489    | 0.0044 | 1.34  | Glucose metabolic process                        |
| Kcnp3                | Kv channel interacting protein 3, calsenilin | NM_001111331 | 0.0047 | 1.33  | Apoptosis                                        |
| Htr1d                | 5-hydroxytryptamine (serotonin) receptor 1D  | NM_008309    | 0.0028 | 1.33  | Cell surface receptor linked signal transduction |
| Agt                  | angiotensinogen                              | NM_007428    | 0.0061 | 1.32  | Apoptosis                                        |
| Rhobtb2              | Rho-related BTB domain containing 2          | NM_153514    | 0.0033 | 1.32  | Intracellular signaling cascade                  |
| Hgfac                | hepatocyte growth factor activator           | NM_019447    | 0.0019 | 1.32  | Proteolysis                                      |
| Trappc6b             | trafficking protein particle complex 6B      | NM_030057    | 0.0031 | 1.32  | Transport                                        |
| Ddc                  | dopa decarboxylase                           | NM_016672    | 0.0023 | 1.31  | Response to stress                               |
| Klf3                 | Kruppel-like factor 3                        | NM_008453    | 0.0029 | 1.30  | Nucleus                                          |
| Hip1r                | huntingtin interacting protein 1 related     | NM_145070    | 0.0047 | 1.21  | Cytoskeleton                                     |
| Gpx3                 | glutathione peroxidase 3                     | NM_001083929 | 0.0072 | 1.18  | Response to stress                               |
| Fgf10                | fibroblast growth factor 10                  | NM_008002    | 0.0068 | 1.08  | Intracellular signaling cascade                  |
| <b>Downregulated</b> |                                              |              |        |       |                                                  |
| Pdx1                 | pancreatic and duodenal homeobox 1           | NM_008814    | 0.0085 | -1.99 | Glucose metabolic process                        |
| Rbm3                 | RNA binding motif protein 3                  | NM_001166409 | 0.0019 | -1.76 | Transport                                        |
| Fdps                 | farnesyl diphosphate synthetase              | NM_134469    | 0.0047 | -1.71 | Lipid metabolic process                          |
| Incenp               | inner centromere protein                     | NM_016692    | 0.0045 | -1.64 | Nucleus                                          |
| Ece1                 | endothelin converting enzyme 1               | NM_199307    | 0.0058 | -1.62 | Proteolysis                                      |
| Rab6                 | RAB6, member RAS oncogene family             | NM_001163663 | 0.0082 | -1.54 | Transport                                        |
| CD47                 | CD47 antigen                                 | NM_010581    | 0.0079 | -1.53 | Response to stress                               |
| Cdk2                 | cyclin-dependent kinase 2                    | NM_016756    | 0.0051 | -1.48 | Transport                                        |
| Chst8                | carbohydrate sulfotransferase 8              | NM_175140    | 0.0092 | -1.44 | Glucose metabolic process                        |
| Gemin6               | gem (nuclear organelle) associated protein 6 | NM_026053    | 0.0057 | -1.44 | Nucleus                                          |
| Caml                 | calcium modulating ligand                    | NM_007596    | 0.008  | -1.39 | Cell surface receptor linked signal transduction |
| Dok5                 | docking protein 5                            | NM_001163686 | 0.0094 | -1.37 | Intracellular signaling cascade                  |
| Phox2a               | paired-like homeobox 2a                      | NM_008887    | 0.0072 | -1.34 | Regulation of transcription                      |
| Hk1                  | hexokinase 1                                 | NM_001146100 | 0.0011 | -1.23 | Glucose metabolic process                        |

Regulated mRNAs in Pdx1 knock down MIN6 cells. The fold change of mRNA transcripts in Pdx1 knock down MIN6 cells ( $n = 3$ ) are shown in comparison to control ( $n = 3$ ). Transcripts ( $p < 0.01$ ) are presented in order of  $p$ -value, lowest to highest. 56 transcripts are upregulated, 14 are downregulated.

### Supplemental methods

*Quantification of mRNA levels.* RNA isolation, first strand cDNA synthesis, and TaqMan gene expression assays were performed as previously described (1, 2). Applied Biosystems TaqMan assay numbers were: Hmbs, Mm00660262\_g1; Bim, Mm01333921\_m1; Puma, Mm00519268\_m1; Bcl2l14, Mm01261010\_m1.

*In vivo characterization of mice.* The *Pdx1*<sup>+/-</sup> mice have been previously described (3), and were kindly provided by Dr. Helena Edlund (University of Umea, Umea Sweden). *Nix*<sup>-/-</sup> mice have been described (4). Male mice were fed a normal chow or high fat diet containing 42% fat

(Harlan Laboratories, Inc.) from 3 weeks of age, and provided with water ad libitum. Intraperitoneal glucose tolerance tests (IPGTTs) were performed after a 4 hour fast (1 g dextrose/kg body weight). Insulin levels were measured at fasting and 30 minutes after glucose challenge.  $\beta$ -cell area was quantified from anti-insulin stained pancreas sections counterstained with hemotoxylin using the intensity thresholding function of the integrated morphometry package in MetaMorph. All experiments in this study using animal protocols were approved by the Washington University Animal Studies Committee.

*Detection of autophagy by immunostaining.* The presence of autophagosomes in islets was evaluated using immunostaining as previously described (1). For immunostaining, the mice were anesthetized and perfused through the left ventricle with 3.7% formaldehyde. The pancreas was isolated and then fixed at room temperature overnight. To quantitate the extent of autophagy, the number of LC3 punctae in insulin-positive cells was counted in five independent visual fields from at least two independent experiments.

*Statistical analysis.* Multiple experimental groups were compared using one-way ANOVA and Tukey's post hoc test. The 2-tailed unpaired Student's *t* test was used to assess the statistical significance of differences between 2 sets of data. Differences were considered significant when  $p < 0.05$ . Results are presented as mean  $\pm$  SEM.

### **Supplemental references**

1. Fujimoto K, et al. Autophagy regulates pancreatic beta cell death in response to Pdx1 deficiency and nutrient deprivation. *J Biol Chem.* 2009;284(40):27664-27673.
2. Fujimoto K, Chen Y, Polonsky KS, Dorn GW 2nd. Targeting cyclophilin D and the mitochondrial permeability transition enhances  $\beta$ -cell survival and prevents diabetes in Pdx1 deficiency. *Proc Natl Acad Sci USA.* 2010;107(22):10214-10219.
3. Jonsson J, Carlsson L, Edlund T, Edlund H. Insulin-promoter-factor 1 is required for pancreas development in mice. *Nature.* 1994;371(6498):606-609.
4. Diwan A, et al. Unrestrained erythroblast development in *Nix*<sup>-/-</sup> mice reveals a mechanism for apoptotic modulation of erythropoiesis. *Proc Natl Acad Sci USA.* 2007;104(16):6794-6799.
